# Supplementary material for: Multimodal integration of radiology, pathology and genomics for prediction of response to PD-(L)1 blockade in patients with non-small cell lung cancer
Source: PubMed Central journal article supplement (PMC9586871; doi:10.1038/s43018-022-00416-8), 2022-08-29
Supplement: 43018_2022_416_MOESM1_ESM.pdf [file 43018_2022_416_MOESM1_ESM.pdf]

---

**Supplementary information**

---

**Multimodal integration of radiology,  
pathology and genomics for prediction of  
response to PD-(L)1 blockade in patients  
with non-small cell lung cancer**

---

In the format provided by the  
authors and unedited

| <b>Model</b>            | <b>F1-score</b> | <b>Precision Score</b> | <b>Recall Score</b> | <b>AUC</b> | <b>Accuracy</b> |
|-------------------------|-----------------|------------------------|---------------------|------------|-----------------|
| LR Clinical             | 0.680982        | 0.787234               | 0.600000            | 0.569606   | 0.577236        |
| LR Rad-PC               | 0.736364        | 0.810000               | 0.675000            | 0.639341   | 0.644172        |
| LR Rad-LN               | 0.682927        | 0.717949               | 0.651163            | 0.626938   | 0.611940        |
| LR Rad-Average          | 0.722892        | 0.796460               | 0.661765            | 0.645040   | 0.631016        |
| MILR Rad-Lesions        | 0.632479        | 0.755102               | 0.544118            | 0.620314   | 0.540107        |
| LR IHC-A                | 0.666667        | 0.701754               | 0.634921            | 0.623961   | 0.619048        |
| LR IHC-G                | 0.666667        | 0.722222               | 0.619048            | 0.633787   | 0.628571        |
| LR PDL1-TPS             | 0.788530        | 0.839695               | 0.743243            | 0.729284   | 0.706468        |
| LR Path-A-Average       | 0.802817        | 0.838235               | 0.770270            | 0.695117   | 0.721393        |
| LR Path-G-Average       | 0.811189        | 0.840580               | 0.783784            | 0.694225   | 0.731343        |
| LR Gen-Only-TMB         | 0.794444        | 0.817143               | 0.772973            | 0.606931   | 0.700405        |
| LR Gen-No-TMB           | 0.486056        | 0.924242               | 0.329730            | 0.605100   | 0.477733        |
| LR Gen-Average          | 0.769231        | 0.813253               | 0.729730            | 0.658195   | 0.672065        |
| LR Gen-Combined         | 0.769231        | 0.813253               | 0.729730            | 0.654795   | 0.672065        |
| DyAM IHC-A              | 0.655462        | 0.696429               | 0.619048            | 0.605631   | 0.609524        |
| DyAM Gen                | 0.716511        | 0.845588               | 0.621622            | 0.675850   | 0.631579        |
| DyAM Rad                | 0.773946        | 0.808000               | 0.742647            | 0.701413   | 0.684492        |
| DyAM Rad+IHC-A          | 0.755245        | 0.812030               | 0.705882            | 0.680753   | 0.668246        |
| DyAM IHC-A+Gen          | 0.777448        | 0.861842               | 0.708108            | 0.714996   | 0.696356        |
| DyAM Rad+Gen            | 0.785924        | 0.858974               | 0.724324            | 0.759285   | 0.704453        |
| DyAM TMB+PDL1           | 0.746269        | 0.833333               | 0.675676            | 0.693112   | 0.655870        |
| DyAM Rad+IHC-A+Gen      | 0.783626        | 0.853503               | 0.724324            | 0.754228   | 0.700405        |
| DyAM Rad+IHC-G+Gen      | 0.794118        | 0.870968               | 0.729730            | 0.782563   | 0.716599        |
| DyAM Rad+IHC-A+Gen+PDL1 | 0.818713        | 0.891720               | 0.756757            | 0.798169   | 0.748988        |
| DyAM Rad+IHC-G+Gen+PDL1 | 0.836676        | 0.890244               | 0.789189            | 0.783348   | 0.769231        |
| LR Multimodal-Average   | 0.777778        | 0.847134               | 0.718919            | 0.723365   | 0.692308        |
